# Supplementary material for: Feedback on teachers' text assessment: Does it foster assessment accuracy and motivation?
Source: Atypon-hosted journal article supplement (doi:10.1024/1010-0652/a000365), 2023-06-12
Supplement: 1010-0652_a000365_esm1.pdf [file 1010-0652_a000365_esm1.pdf]

# Electronic Supplementary Material 1

**Figure S1**

*Mean Number of Teachers' Assessments and Experts' Judgment for 10 Texts Split by Scale*

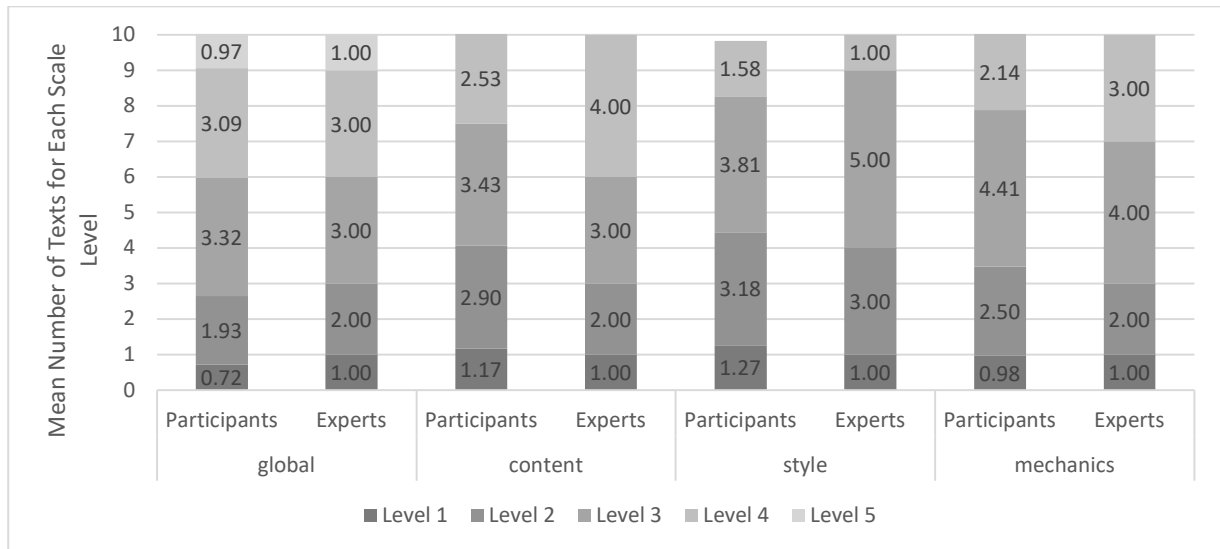

**Figure S2**

*Linking Theoretical Assumptions To the Feedback*

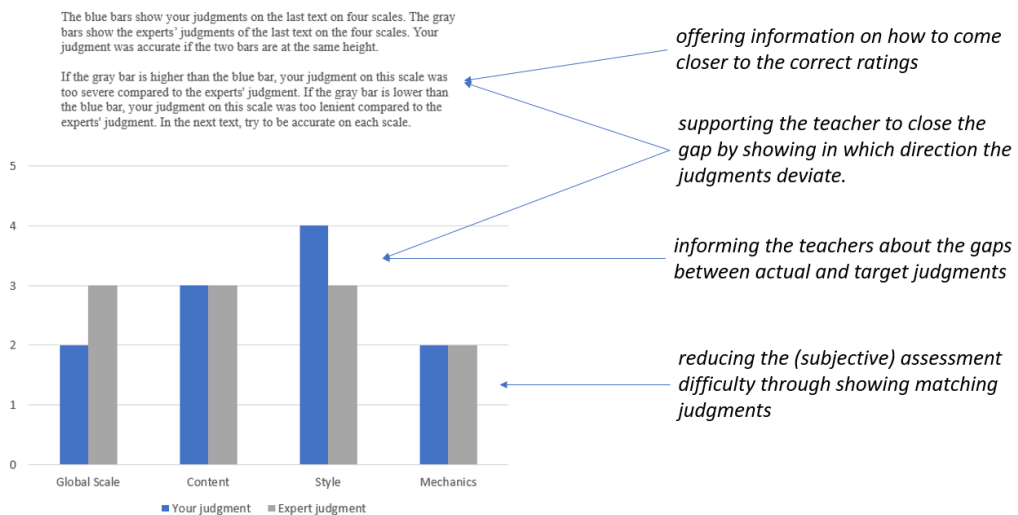

### Figure S3

#### *Feedback After the First Five Texts*

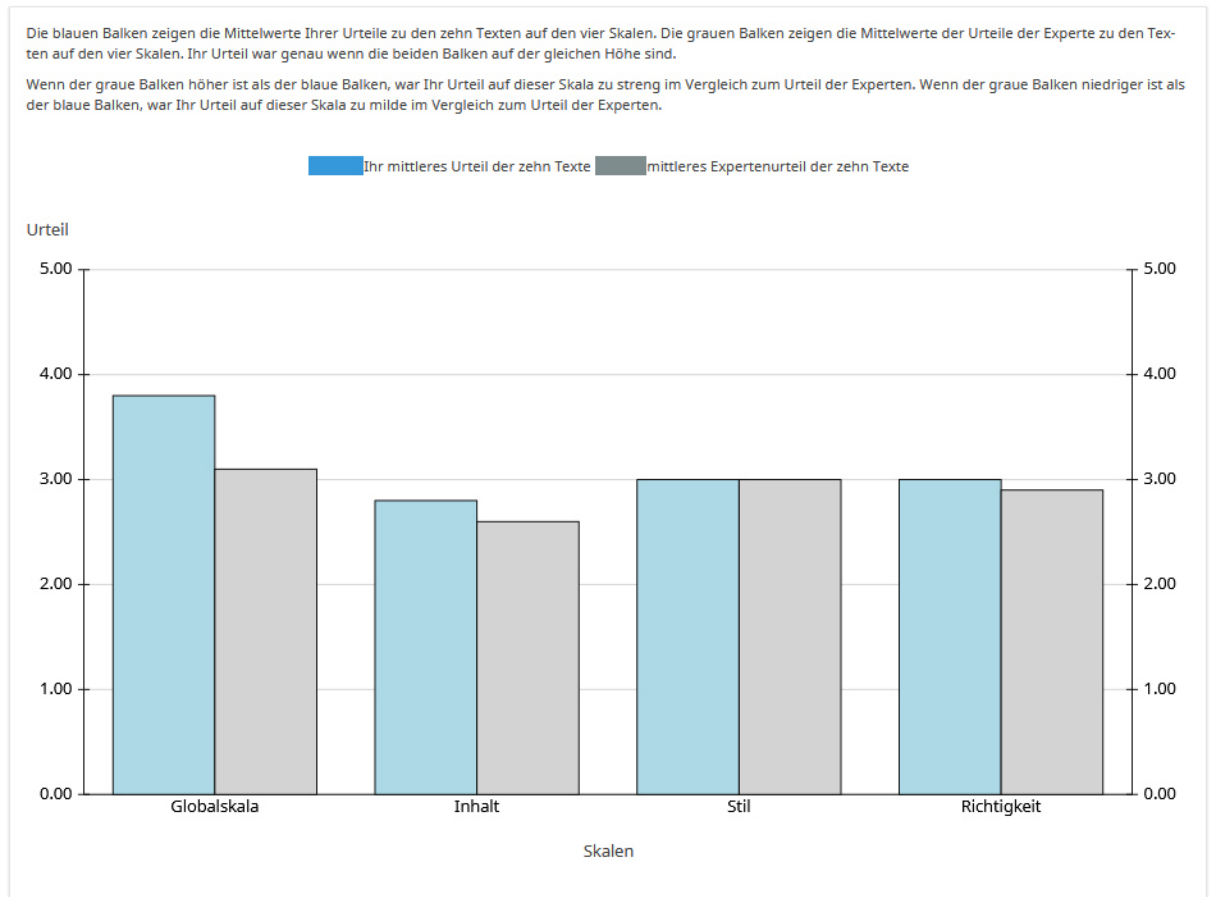

The blue bars show the mean values of your judgments on the 10 texts on the four scales. The gray bars show the mean values of the experts' judgments on the texts on the four scales. Your judgment was accurate if the two bars have the same height.

If the gray bar is higher than the blue bar, your judgment on this scale was too strict compared to the experts' judgment. If the gray bar is lower than the blue bar, your judgment on this scale was too lenient compared to the experts' judgment.

**Figure S4**

*Group Differences on Multiple Components of Assessment Accuracy for the First Five Texts*

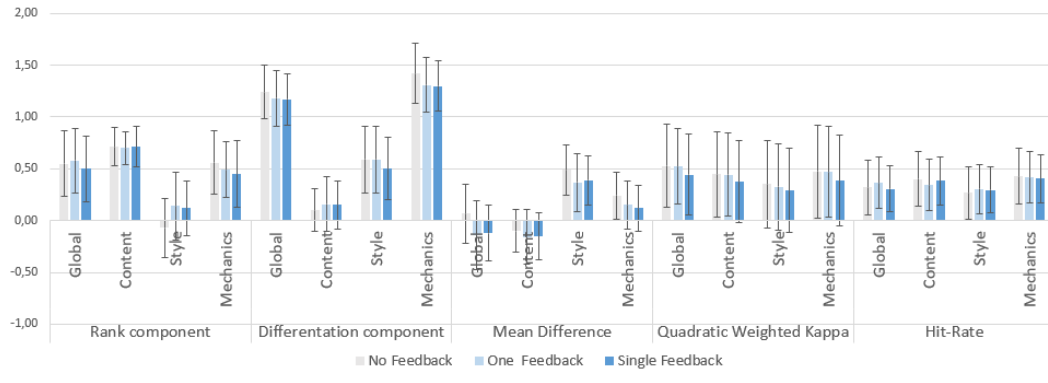

**Figure S5**

*Group Differences on Multiple Components of Assessment Accuracy for the Last Five Texts*

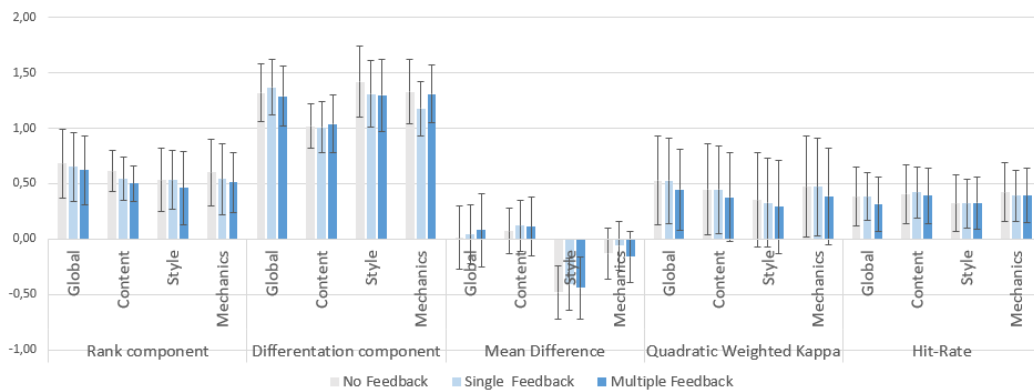

**Figure S6**

*Assessment Accuracy, Split from Text 1 to Text 10*

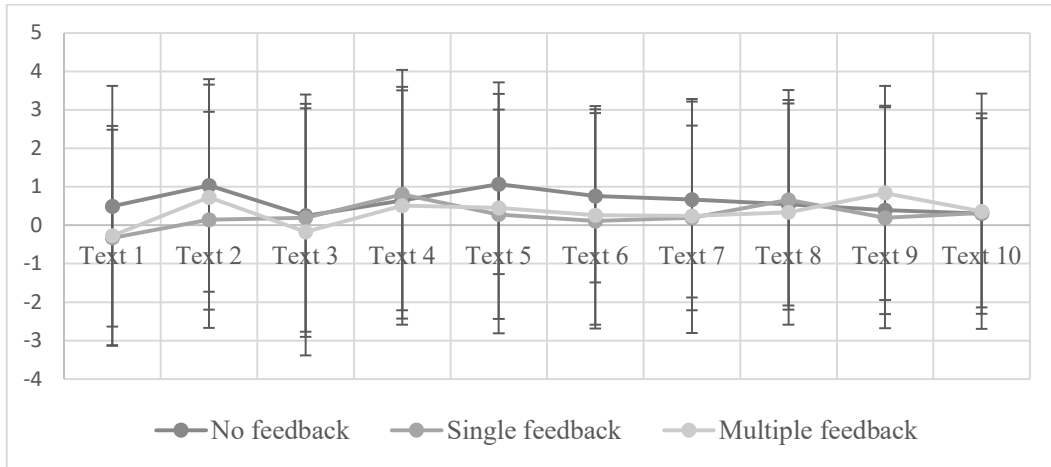

**Table S1***Randomization Check For the Covariates*

|                   | <i>N</i> | <i>n</i><br>female | <i>n</i><br>experienced<br>teachers | Mean<br>( <i>SD</i> )<br>years<br>of<br>experience | <i>n</i><br>student<br>of<br>teachers | No.<br>of<br>semesters<br>studied |
|-------------------|----------|--------------------|-------------------------------------|----------------------------------------------------|---------------------------------------|-----------------------------------|
| No feedback       | 85       | 56                 | 31                                  | 8.37 (10.69)                                       | 54                                    | 8.63 (9.57)                       |
| Single feedback   | 112      | 80                 | 46                                  | 11.33<br>(12.03)                                   | 66                                    | 8.53 (9.87)                       |
| Multiple feedback | 98       | 65                 | 37                                  | 10.94<br>(11.55)                                   | 61                                    | 8.99 (9.96)                       |

**Table S2***Means (Standard Deviations) for Assessment Accuracy of the First Five Texts, Split by Group and Scale*

|                      | Mean Difference |                 |                |                | Hit Rate       |                |                |                |
|----------------------|-----------------|-----------------|----------------|----------------|----------------|----------------|----------------|----------------|
|                      | Global          | Content         | Style          | Mecha<br>nics  | Global         | Content        | Style          | Mecha<br>nics  |
| No<br>Feedback       | 0.07<br>(0.57)  | -0.10<br>(0.41) | 0.49<br>(0.48) | 0.24<br>(0.46) | 0.32<br>(0.53) | 0.40<br>(0.53) | 0.27<br>(0.51) | 0.42<br>(0.54) |
| Single<br>Feedback   | -0.14<br>(0.66) | -0.16<br>(0.53) | 0.37<br>(0.56) | 0.15<br>(0.46) | 0.31<br>(0.49) | 0.38<br>(0.50) | 0.29<br>(0.47) | 0.39<br>(0.49) |
| Multiple<br>Feedback | -0.12<br>(0.53) | -0.15<br>(0.46) | 0.39<br>(0.47) | 0.12<br>(0.44) | 0.36<br>(0.44) | 0.34<br>(0.46) | 0.31<br>(0.44) | 0.39<br>(0.46) |

*Note:* Correct judgments would result in a mean of zero for the mean difference and a value of one for the hit rate.

**Table S3***Test Statistic for Assessment Accuracy*

|            | Mean Difference |         |       |           | Mean Hit Rate |         |       |           |
|------------|-----------------|---------|-------|-----------|---------------|---------|-------|-----------|
|            | Global Scale    | Content | Style | Mechanics | Global Scale  | Content | Style | Mechanics |
| F (2, 288) | 0.264           | 0.249   | 0.471 | 1.116     | 3.512         | 0.548   | 0.014 | 0.313     |
| <i>p</i>   | .768            | .779    | .625  | .329      | .031          | .579    | .986  | .731      |
